# Supplementary material for: Antioxidant and Anticancer Assessment and Phytochemical Investigation of Three Varieties of Date Fruits
Source: MDPI journal article supplement (doi:10.3390/metabo13070816), 2023-07-03
Supplement: s1 [file s1]

## Supplementary Materials

### Table of Contents

- Figure S1.** HPLC Chromatogram of separated amino acids from Ajwa date fruit.  
**Figure S2.** HPLC Chromatogram of separated amino acids from Siwi date fruit.  
**Figure S3.** HPLC Chromatogram of separated amino acids from Sukkari date fruit.  
**Figure S4.** HPLC-DAD analysis Chromatogram of Ajwa Ethyl acetate extract.  
**Figure S5.** HPLC-DAD analysis Chromatogram of Siwi Ethyl acetate extract.  
**Figure S6.** HPLC-DAD analysis Chromatogram of Sukkari Ethyl acetate extract.  
**Table S1.** IC<sub>50</sub> of Ajwa examined extracts on different cell lines.  
**Table S2.** IC<sub>50</sub> of Siwi examined extracts on different cell lines.  
**Table S3.** IC<sub>50</sub> of Sukkari examined extracts on different cell lines.

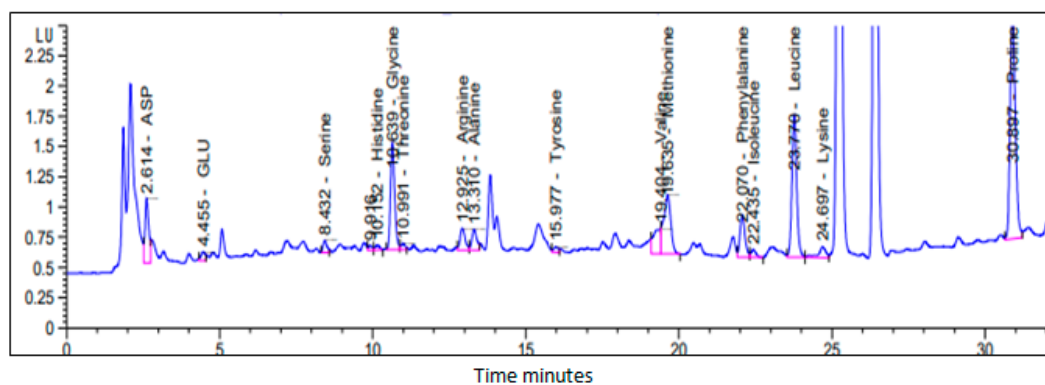

**Figure S1.** HPLC Chromatogram of separated amino acids from Ajwa date fruit.

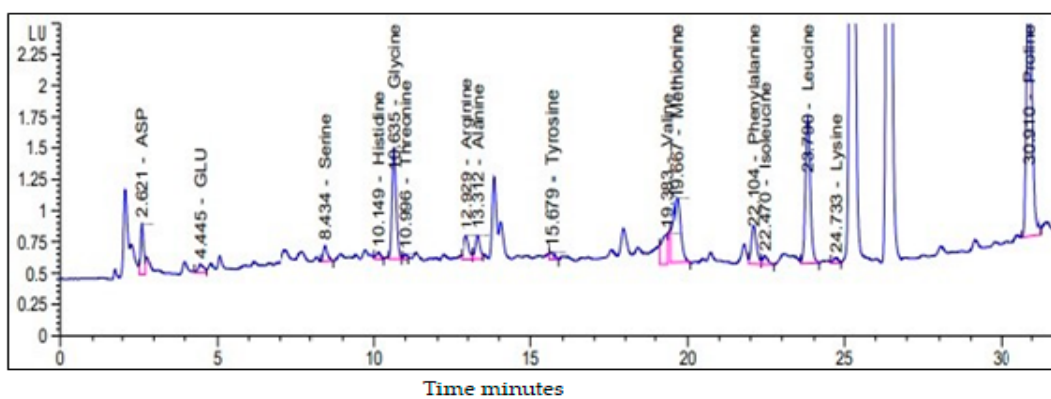

**Figure S2.** HPLC Chromatogram of separated amino acids from Siwi date fruit.

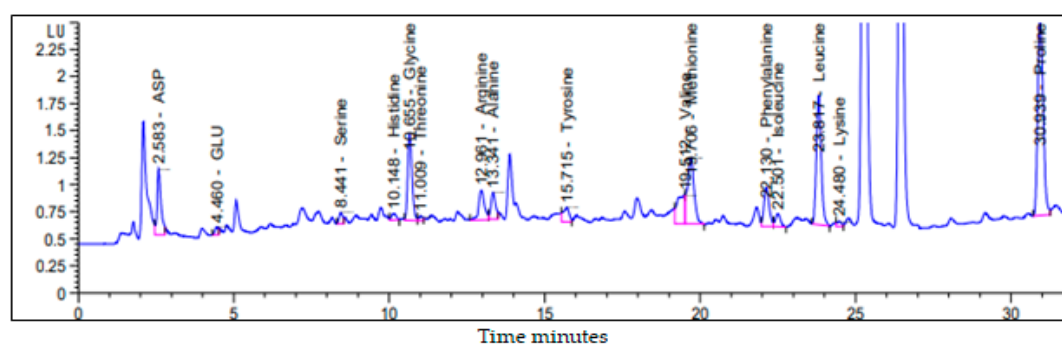

**Figure S3.** HPLC Chromatogram of separated amino acids from Sukkari date fruit.

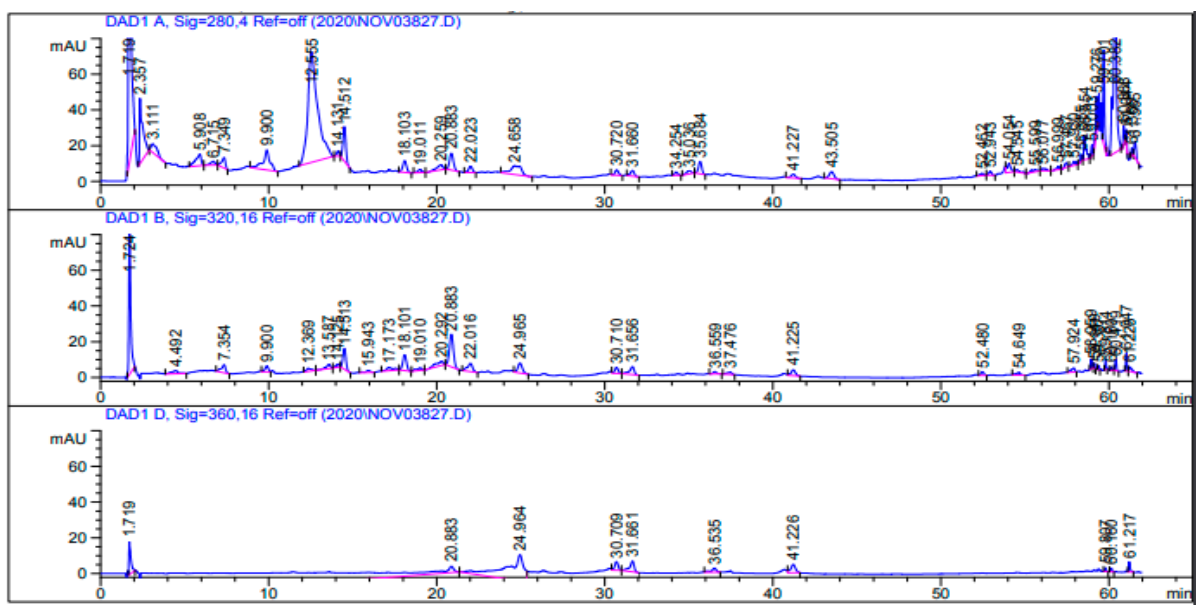

Figure S4. HPLC-DAD analysis Chromatogram of Ajwa Ethyl acetate extract.

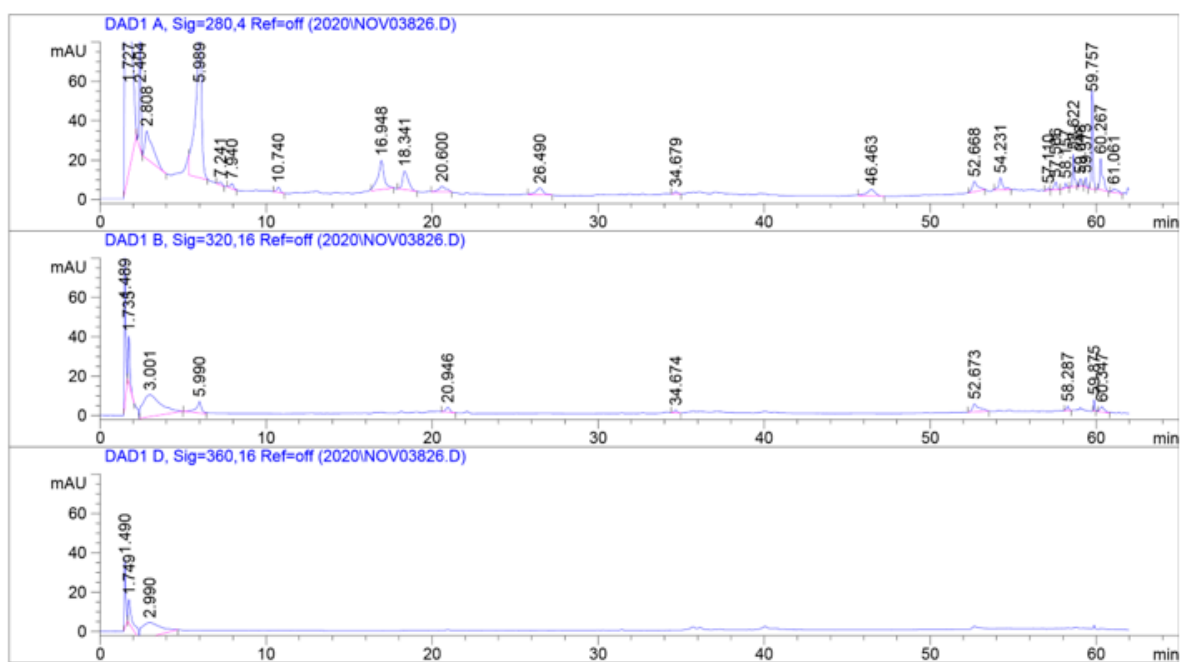

Figure S5. HPLC-DAD analysis Chromatogram of Siwi Ethyl acetate extract.

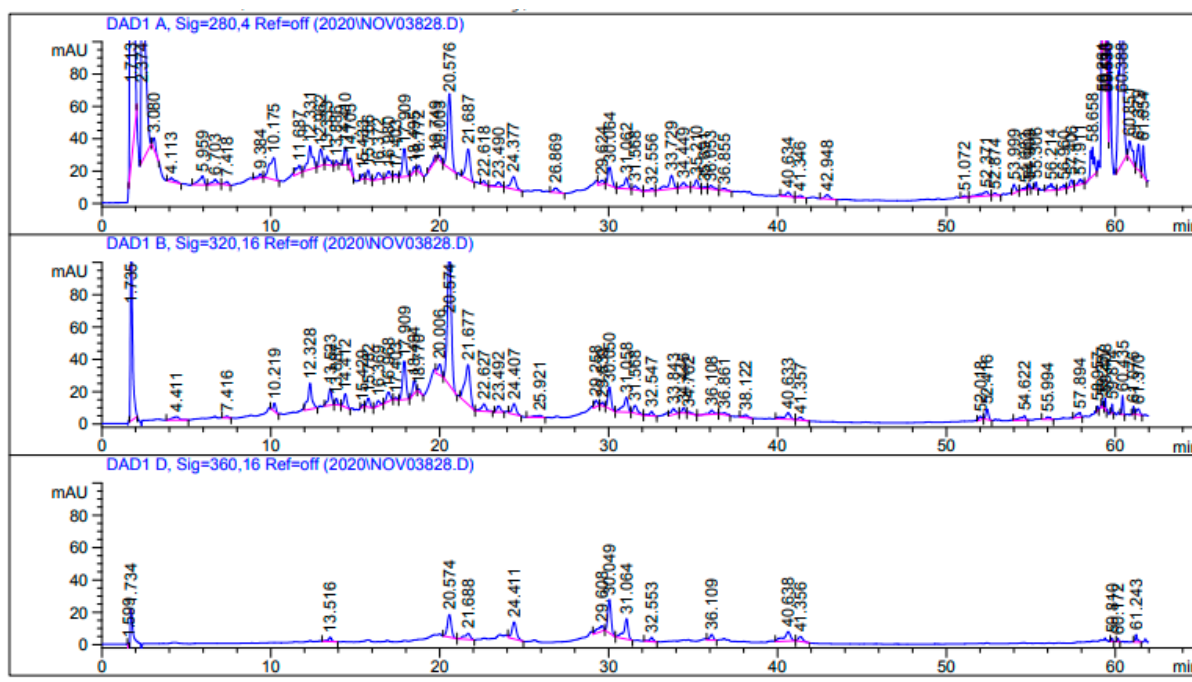

**Figure S6.** HPLC-DAD analysis Chromatogram of Sukkari Ethyl acetate extract.

**Table S1.** Cytotoxicity ( $IC_{50}$ ;  $\mu\text{g/ml}$ ) of Ajwa examined extracts on different cell lines.

| Cancer cell line | Ajwa/ EtOH    | Ajwa/ MeOH    | Ajwa/ EtOAc   |
|------------------|---------------|---------------|---------------|
| MG-63            | 123 $\pm$ 1.5 | 197 $\pm$ 2   | 144 $\pm$ 1.9 |
| HCT116           | 198 $\pm$ 1.8 | 260 $\pm$ 3   | 134 $\pm$ 1.5 |
| MCF7             | 204 $\pm$ 1.7 | 200 $\pm$ 2   | 212 $\pm$ 3   |
| MDA-MB-231       | 225 $\pm$ 4.5 | 242 $\pm$ 4   | 225 $\pm$ 3.8 |
| HEPG2            | 225 $\pm$ 2   | 327 $\pm$ 5.6 | 387 $\pm$ 4   |
| HuH7             | 120 $\pm$ 3   | 228 $\pm$ 2.2 | 125 $\pm$ 1.8 |
| A549             | 159 $\pm$ 2.5 | 282 $\pm$ 3   | 209 $\pm$ 3   |
| H460             | 242 $\pm$ 4   | 227 $\pm$ 4   | 248 $\pm$ 5   |
| HFB4             | -             | -             | -             |

**Table S2.** Cytotoxicity ( $IC_{50}$ ;  $\mu\text{g/ml}$ ) of Siwi examined extracts on different cell lines.

| Cancer cell line | Siwi/ EtOH    | Siwi / MeOH   | Siwi/ EtOAc   |
|------------------|---------------|---------------|---------------|
| MG-63            | 285 $\pm$ 3   | 245 $\pm$ 2.2 | 233 $\pm$ 3.4 |
| HCT116           | 231 $\pm$ 2.5 | 206 $\pm$ 2   | 230 $\pm$ 2.4 |
| MCF7             | 236 $\pm$ 2.9 | 225 $\pm$ 3.5 | 245 $\pm$ 4   |
| MDA-MB-231       | 149 $\pm$ 3   | 99 $\pm$ 1.6  | 158 $\pm$ 2   |
| HEPG2            | 227 $\pm$ 3   | 227 $\pm$ 3.6 | 314 $\pm$ 5   |
| HuH7             | 137 $\pm$ 1.6 | 259 $\pm$ 2.8 | 138 $\pm$ 2   |
| A549             | 229 $\pm$ 4   | 272 $\pm$ 4.5 | 221 $\pm$ 3   |
| H460             | 324 $\pm$ 5   | 246 $\pm$ 3   | 218 $\pm$ 2   |
| HFB4             | -             | -             | -             |

**Table S3.** Cytotoxicity (IC<sub>50</sub>; µg/ml) of Sukkari examined extracts on different cell lines.

| Cancer cell line | Sukkari / EtOH | Sukkari / MeOH | Sukkari / EtOAc |
|------------------|----------------|----------------|-----------------|
| MG-63            | 296 ± 2.5      | -              | 260 ± 1.7       |
| HCT116           | 240 ± 4        | 204 ± 2.6      | 150 ± 3         |
| MCF7             | 202 ± 2        | 225 ± 3.3      | 226 ± 2.8       |
| MDA-MB-231       | 296 ± 4.4      | 119 ± 3.5      | 128 ± 2         |
| HEPG2            | 357 ± 5        | 247 ± 3.4      | 224 ± 3         |
| HuH7             | 225 ± 2        | 269 ± 2        | 138 ± 1.9       |
| A549             | 216 ± 4        | 239 ± 5.2      | 221 ± 5         |
| H460             | 236 ± 4        | 273 ± 5        | 186 ± 4         |
| HFB4             | -              | -              | -               |
